# Supplementary material for: Facile synthesis of concave decahedra enclosed by high-index facets and truncated decahedra with a large size
Source: Royal Society of Chemistry journal article supplement (doi:10.1039/c2dt12469f), 2012-01-01
Supplement: c2dt12469f.pdf [file c2dt12469f.pdf]

## Electronic Supplementary Information

### Facile Synthesis of Concave Decahedra Enclosed by High-Index Facets and Truncated Decahedra with a Large Size

5

Lin-Fei Zhang,<sup>a, §</sup> Lei Wang,<sup>a, §</sup> Sheng-Liang Zhong,<sup>\*a,b</sup> Yu-Xi Huang<sup>a</sup> and  
An-Wu Xu<sup>\*a</sup>

<sup>a</sup>Division of Nanomaterials and Chemistry, Hefei National Laboratory for Physical  
Sciences at Microscale, Department of Chemistry, University of Science and  
10 Technology of China, Hefei 230026, China

Fax: (+86) 551-360 0246, E-mail: [anwuxu@ustc.edu.cn](mailto:anwuxu@ustc.edu.cn)

<sup>b</sup>College of Chemistry and Chemical Engineering, Jiangxi Normal University,  
Nanchang 330022, China. Fax: (+86) 791-812 0386, E-mail: [zslxhx@yahoo.com.cn](mailto:zslxhx@yahoo.com.cn)

15 <sup>§</sup> Lin-Fei Zhang and Lei Wang contributed equally to this work.

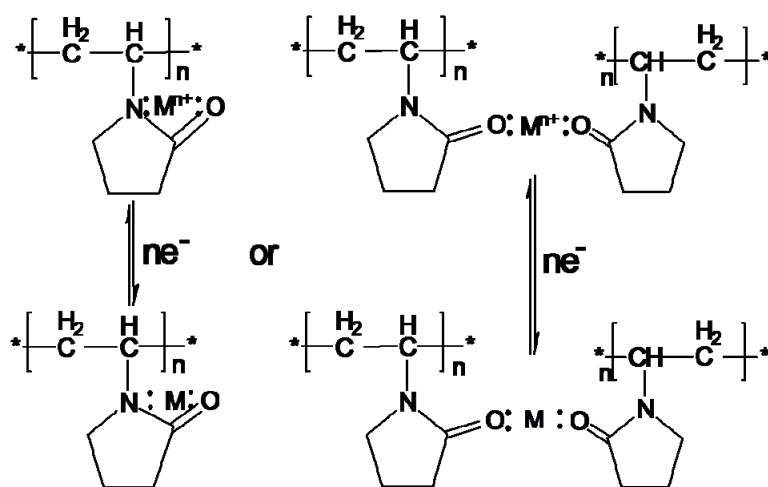

Figure S1 Complexation of metal ions with PVP chains.<sup>[S1]</sup>

**TABLE S1: Samples and Corresponding Experimental Conditions**

| sample | Reaction time (h) | Reaction Temperature (°C) | HAuCl <sub>4</sub> /DMF (μL) | PVP-K30 (g) | DMF (mL) | KI/DMF (μL) | AgNO <sub>3</sub> /DMF (μL) | Morphology (SEM)                |
|--------|-------------------|---------------------------|------------------------------|-------------|----------|-------------|-----------------------------|---------------------------------|
| 1      | 4                 | 80                        | 150                          | 2.2         | 12       | 0           | 0                           | concave nanoparticles           |
| 2      | 8                 | 80                        | 150                          | 2.2         | 12       | 0           | 0                           | concave decahedra               |
| 3      | 10                | 80                        | 150                          | 2.2         | 12       | 0           | 0                           |                                 |
| 4      | 12                | 80                        | 150                          | 2.2         | 12       | 0           | 0                           |                                 |
| 5      | 24                | 80                        | 150                          | 2.2         | 12       | 0           | 0                           |                                 |
| 6      | 4                 | 100                       | 150                          | 2.2         | 12       | 0           | 0                           | triangles and regular decahedra |
| 7      | 6                 | 100                       | 150                          | 2.2         | 12       | 0           | 0                           | truncated decahedra             |
| 8      | 8                 | 100                       | 150                          | 2.2         | 12       | 0           | 0                           | dodecagonal plates              |
| 9      | 12                | 100                       | 150                          | 2.2         | 12       | 0           | 0                           | Triangles plates                |
| 10     | 10                | 80                        | 150                          | 4.0         | 12       | 0           | 0                           | concave decahedra and spheres   |
| 11     | 10                | 80                        | 120                          | 2.2         | 12       | 0           | 0                           | rhombic dodecahedron            |
| 12     | 10                | 60                        | 150                          | 2.2         | 12       | 0           | 0                           | nanoparticles                   |
| 13     | 10                | 80                        | 150                          | 2.2         | 12       | 5           | 0                           | ultrathin plates                |
| 14     | 10                | 80                        | 150                          | 2.2         | 12       | 10          | 0                           |                                 |
| 15     | 10                | 80                        | 150                          | 2.2         | 12       | 0           | 10                          | Tetrahexahedral                 |

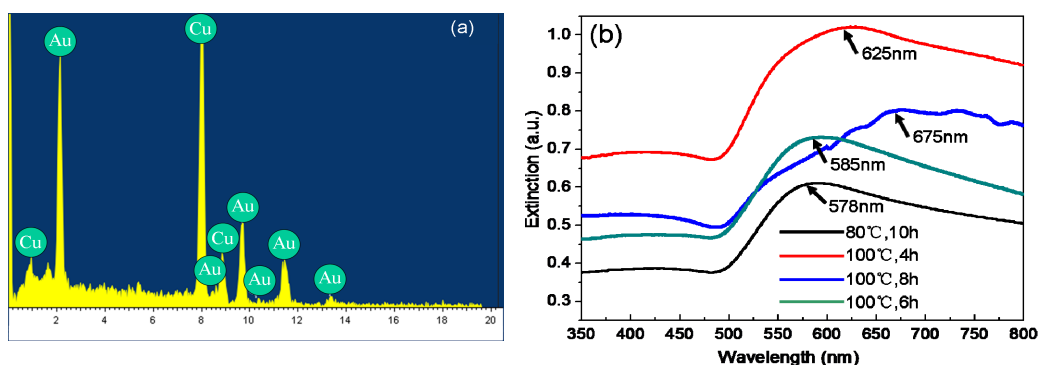

**Figure S2** (a) The energy dispersive X-ray spectroscopy (EDS) indicates that the  
 5 obtained nanoparticles (NPs) are composed of only gold. Cu came from the TEM grid.  
 (b) UV-vis extinction spectra of the obtained samples at the different reaction time and  
 temperature. Black line, at 80 °C for 10 h (concave decahedra); Red line, at 100 °C  
 for 4 h (triangles and regular decahedra ); olive line, at 100 °C for 6 h (truncated  
 decahedra); Blue line, at 100 °C for 8 h (dodecagonal plates).

10

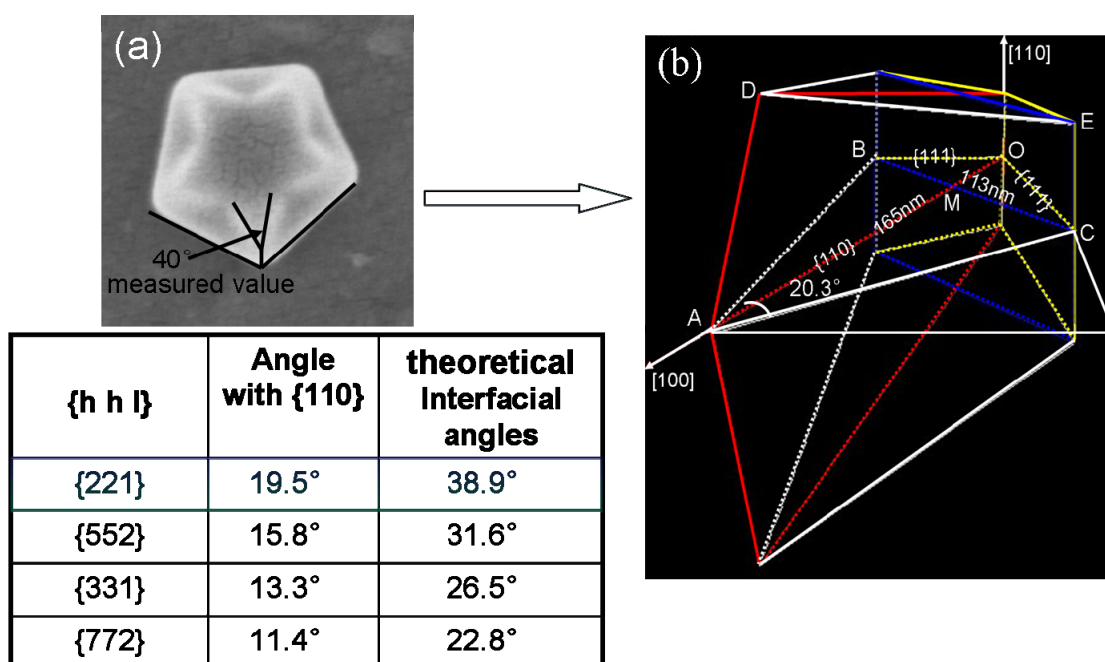

**Figure S3** Gold is a face-centered cubic (fcc) metal. For a five-fold twinned gold NP, the twinned planes of a single crystal are  $\{111\}$ , the zone axis is along  $[110]$ . From the structure analysis we can figure out that the plane along the  $[110]$  zone axis dividing the single crystal into two equal parts is a  $\{110\}$  plane (red line). The cross section of the branch will be  $\{100\}$  (blue line).<sup>[S2]</sup> We can measure that the height of the branch (AM) is about 165 nm, and width (BC) of the button is about 113 nm, then through calculation we know that each tip's interfacial angle is about  $40.6^\circ$ , and half of it is  $20.3^\circ$ . So the side planes of the branch have an interfacial angle of  $20.3^\circ$  with  $\{110\}$  plane (b). From the Table (a, bottom), we know the theoretical value of  $\{221\}$  facets is  $19.5^\circ$ . It is found that the experimental value has a little deviation to the theory value. The interfacial angle of the concave decahedron is measured to be  $40^\circ$  from SEM image (a), and half of it is  $20^\circ$ . Based on analyses mentioned above, the measured value is consistent with the theoretical value of  $19.5^\circ$  corresponding to the angle between  $\{221\}$  and  $\{110\}$ . Therefore, we make sure that the concave planes are  $\{221\}$  high-index facets.

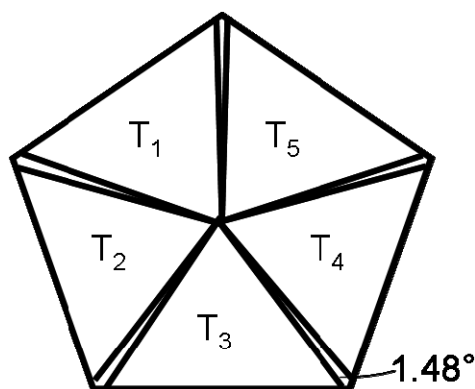

**Figure S4** Sketch of a five-fold-twinned decahedral nanoparticle. The twinned

decahedron particle consists of five tetrahedron units (indicated by  $T_1$  to  $T_5$ ). All the tetrahedrons share a common axis, which is one of the edges of a tetrahedron unit. As the theoretical geometrical angle is about  $70.52^\circ$  between two  $\{111\}$  planes in a tetrahedron, five such tetrahedrons can cover an angle of  $352.6^\circ$  ( $5 \times 70.52^\circ$ ) which is  $7.4^\circ$  short of  $360^\circ$ . Therefore, a theoretical angular gap of about  $1.48^\circ$  exists between adjacent tetrahedron units. In real five-fold-twinned nanoparticles, this gap is closed by stretching the interatomic bond distances.<sup>[S3]</sup>

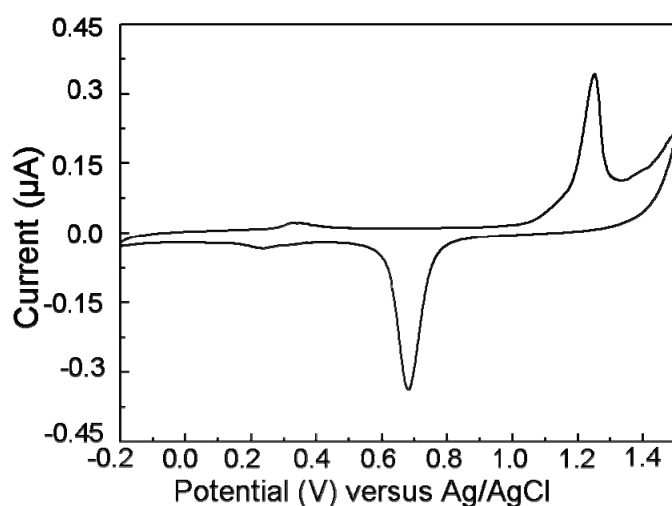

10

**Figure S5** Cyclic voltammograms of concave Au decahedra at  $20 \text{ mV} \cdot \text{s}^{-1}$  in  $0.1 \text{ M H}_2\text{SO}_4$ .

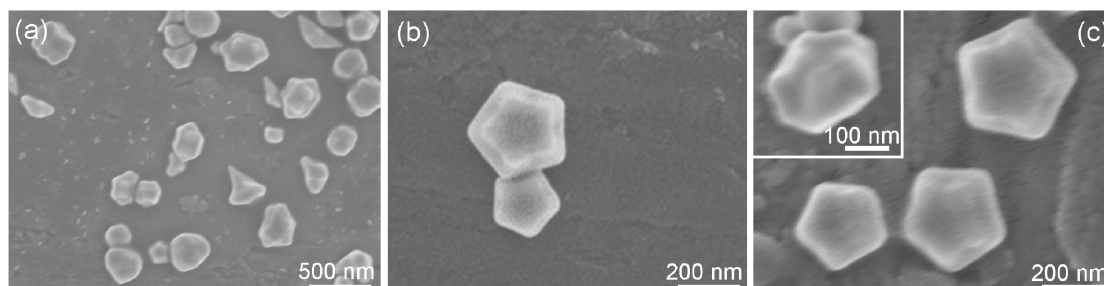

**Figure S6** SEM images showing the morphological evolution of the gold nanocrystals synthesized under different reaction time at 80 °C. (a) 4 h, (b) 8 h, (c) 12 h.

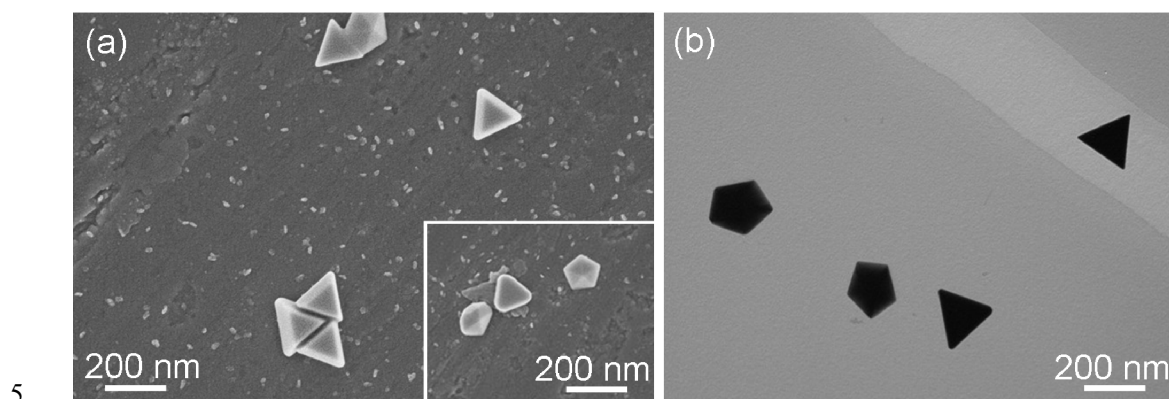

**Figure S7.** SEM image and TEM image showing the gold nanocrystals synthesized at 100 °C for 4 h.

10

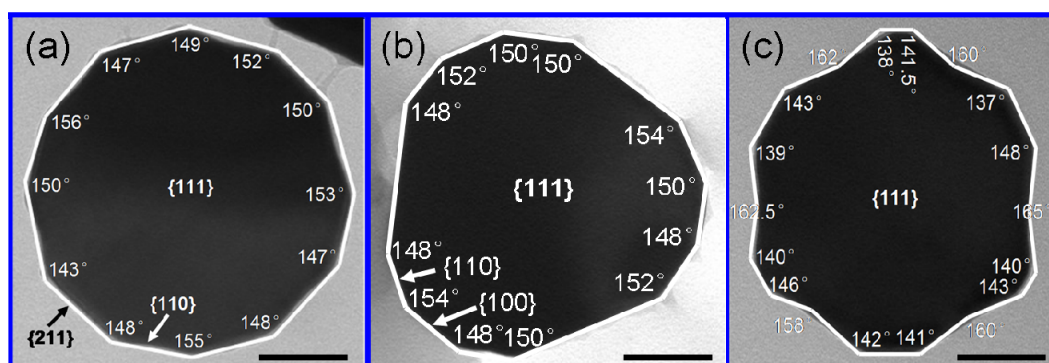

**Figure S8.** The angles relationship with the planes for various dodecagonal plates, scale bar: 100 nm.

The three types of the dodecagon plates have different facets resulting from different growth rates. Since the side planes of this dodecagon bounded alternatively

by  $\{211\}$  and  $\{110\}$  planes ( $E_{\{211\}} = 0.0908 \text{ eV}\cdot\text{\AA}^{-2} < E_{\{110\}} = 0.0991 \text{ eV}\cdot\text{\AA}^{-2}$ ),<sup>[S4]</sup> the final shape of the nanoplates is dependent on the competition of growth rates of these two planes. If  $\{211\}$  faces growth is preferentially inhibited, nonequilateral plates are formed (Figure S5b). Similarly, when  $\{110\}$  faces growth is preferentially inhibited, truncated star-like dodecagon plates are formed (Figure S5c). In the case where the growth of the  $\{211\}$  and  $\{110\}$  planes are simultaneously inhibited, the formation of equilateral structures is highly possible (Figure S5a).

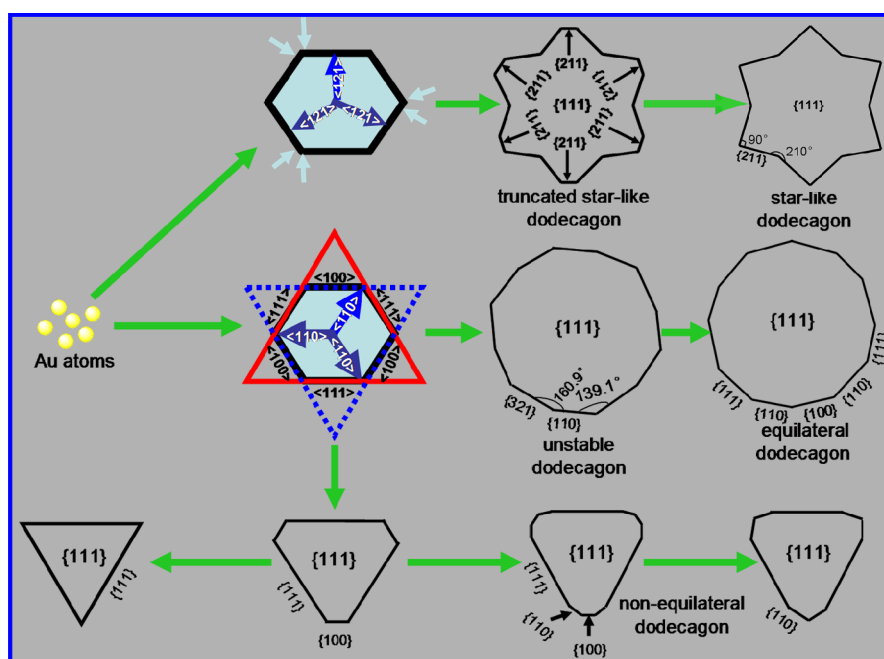

10

**Figure S9.** Schematic representation of the kinetically induced transformation of Au nanoplates.

15

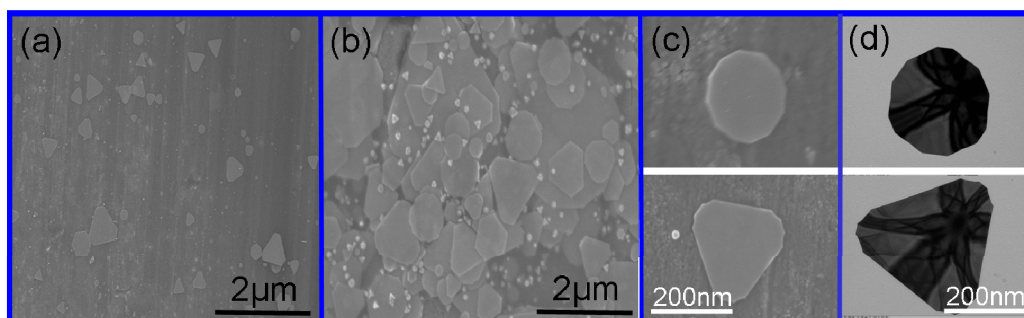

- 5 **Figure S10.** SEM and TEM images of the products obtained after addition of different amount of KI (10 mM) into the reaction solution. (a, c, d) 5  $\mu$ L, (b) 10  $\mu$ L.

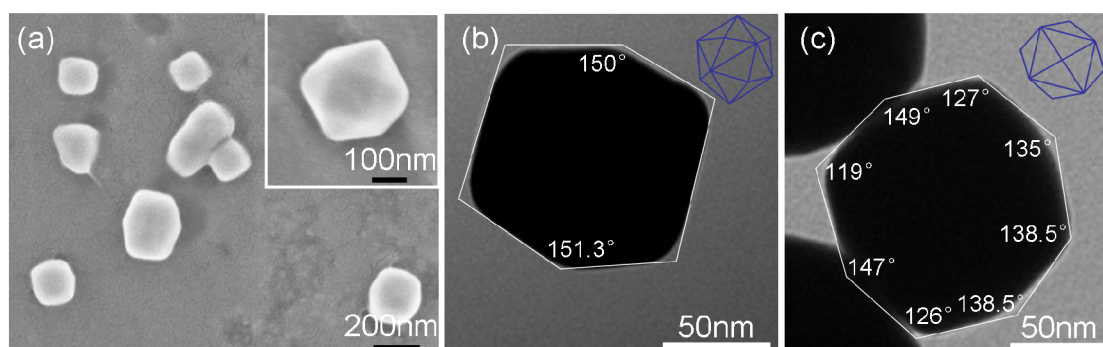

- 10 **Figure S11.** (a) SEM and (b, c) TEM images of the THH Au nanocrystals obtained after addition of  $\text{AgNO}_3$  (10  $\mu$ L, 10 mM) into the reaction solution and refluxed for 10 h at 80  $^\circ\text{C}$ . The insets are the corresponding structure models

15 **References:**

S1 I. Pastoriza-Santos and L. M. Liz-Marzan, *Adv. Funct. Mater.* 2009, **19**, 679.

S2 H. G. Liao, Y. X. Jiang, Z. Y. Zhou, S. P. Chen and S. G. Sun, *Angew. Chem. Int. Ed.*



2008, **47**, 9100.

S3 T. K. Sau and A. L. Rogach, *Adv. Mater.* 2010, **22**, 1781.

S4 C. X. Kan, C. S. Wang, H. C. Li, J. S. Qi, J. J. Zhu, Z. S. Li and D. N. Shi, *Small*  
2010, **6**, 1768.
